# Supplementary material
Source: PubMed Central journal article supplement (PMC1184547)
Supplement: bj3890151add.pdf [file bj3890151add.pdf]

## SUPPLEMENTARY METHODS AND MATERIALS

Table A. SLN, PLB and SERCA PCR-primers for different species (RT-PCR)

| <i>SERCA</i>      | <i>Forward primer (5'→3')</i> | <i>Reverse primer (5'→3')</i> | <i>bp</i> | <i>T<sub>a</sub></i> | <i>#cycli</i> |
|-------------------|-------------------------------|-------------------------------|-----------|----------------------|---------------|
| <b>Pig</b>        | GAGATCGGCATTGCCAT             | GAAGTGCCTTCATGTTGTTGTA        | 138       | 55                   | 23            |
| <b>Rabbit</b>     | GGCTGTCAACCAGGAYAAGA          | GTGCCAGTCTTGTTCAGAGCA         | 475       | 56                   | 25            |
| <b>Rat</b>        | GAYGAGTTTGGGGAACAGCT          | GAGGTGGTGTATGACAGCAGG         | 194       | 58                   | 20            |
| <b>Mouse</b>      | GAYGAGTTTGGGGAACAGCT          | GAGGTGGTGTATGACAGCAGG         | 194       | 58                   | 20            |
| <b><i>PLB</i></b> |                               |                               |           |                      |               |
| <b>Pig</b>        | AGACAGTGATCTCATATTTGGCTGG     | GCAAATCAGCAAGAGGCATA          | 223       | 52                   | 20            |
| <b>Rabbit</b>     | AGAAGACAGTCCTCTCACATCTGGG     | CGATGATGCAGATCAGCAGGAGA       | 231       | 54                   | 25            |
| <b>Rat</b>        | TGTGACGATCACAGAAGCC           | GCAGCAGACATATCAAGATGAG        | 260       | 56                   | 20            |
| <b>Mouse</b>      | ATGACGACGATTCAAATCTCTTGG      | TGGGTTTGCAAAGTTAGGCATAA       | 613       | 53                   | 22            |
| <b><i>SLN</i></b> |                               |                               |           |                      |               |
| <b>Pig</b>        | GAGAATGGAGCGATCCACCC          | ACTTGGCAGCCCTTGAGAGC          | 297       | 56                   | 20            |
| <b>Rabbit</b>     | GAGAATGGAGCGATCCACCC          | ACTTGGCAGCCCTTGAGAGC          | 297       | 56                   | 20            |
| <b>Rat</b>        | GAGGTGGAGAGACTGAGGTCCTTGG     | GAAGCTCGGGGCACACAGCAG         | 266       | 58                   | 20            |
| <b>Mouse</b>      | GAGGTGGAGAGACTGAGGTCCTTGG     | GAAGCTCGGGGCACACAGCAG         | 266       | 58                   | 20            |

bp = number of base pairs; T<sub>a</sub> = PCR annealing temperature (°C); #cycli = number of PCR cycles

Table B. Restriction enzymes for ratio-PCR of SERCA1 and SERCA2

|                      | SERCA1             |           | SERCA2             |           |
|----------------------|--------------------|-----------|--------------------|-----------|
|                      | <i>Res. enzyme</i> | <i>bp</i> | <i>Res. enzyme</i> | <i>bp</i> |
| <b><i>Pig</i></b>    | <i>MspI</i>        | 101 + 38  | <i>AvaII</i>       | 79 + 58   |
| <b><i>Rabbit</i></b> | <i>BamHI</i>       | 275 + 200 | <i>EcoRI</i>       | 300 + 175 |
| <b><i>Rat</i></b>    | <i>NcoI</i>        | 102 + 92  | <i>MseI</i>        | 127 + 67  |
| <b><i>Mouse</i></b>  | <i>NcoI</i>        | 102 + 92  | <i>MseI</i>        | 127 + 67  |

bp = number of base pairs; Res. enzyme = restriction enzyme

Table A. SLN, PLB and SERCA PCR-primers for different species. The primer sequence is shown in 5' → 3' order. The length of the amplified product, the annealing temperature and number of cycles for RT-PCR of each set of primers is indicated. SERCA primers were developed which allow PCR-amplification of both SERCA1 and SERCA2 with the same efficiency.

Table B. Restriction enzymes for ratio-PCR of SERCA1 and SERCA2. After co-amplification of SERCA1 and SERCA2 with RT-PCR, the amplified product was digested with restriction enzymes specific for SERCA1 or SERCA2 cleavage. The choice of restriction enzyme is dependent on the species and SERCA isoform. The length of the digested fragments is indicated in base pairs.
